# Supplementary material for: Increased Surgical Complications but Improved Overall Survival with Adult Living Donor Compared to Deceased Donor Liver Transplantation: A Systematic Review and Meta-Analysis
Source: Biomed Res Int. 2020 Aug 24;2020:1320830. doi: 10.1155/2020/1320830 (PMC7468609; doi:10.1155/2020/1320830)
Supplement: Supplementary Materials — We submitted supporting information to help improve and prove the reporting quality of our study. These include the PRISMA 2009 checklist and the PRISMA 2009 flow diagram. [file 1320830.f1.zip]

Archive with 2 entries (2 files):
- PRISMA-2009-checklist.doc
- PRISMA-2009-flow-diagram.doc
